# Supplementary material for: Sex-Based Difference in Aortic Dissection Outcomes: A Multicenter Study
Source: MDPI journal article supplement (doi:10.3390/jcdd10040147), 2023-03-30

**Supplementary Table S1.** Covariate balance analyses in weighted samples for the female and male patients.

| Variable                                        | Type    | Unadjusted sample |                       |                 |                       |                    |                   |        | Adjusted sample      |                       |                    |                       |                    |                   |        |
|-------------------------------------------------|---------|-------------------|-----------------------|-----------------|-----------------------|--------------------|-------------------|--------|----------------------|-----------------------|--------------------|-----------------------|--------------------|-------------------|--------|
|                                                 |         | Female<br>192 pts |                       | Male<br>441 pts |                       | Balance Measures   |                   |        | Female<br>145.02 pts |                       | Male<br>416.54 pts |                       | Balance Measures   |                   |        |
|                                                 |         | Mean              | Standard<br>deviation | Mean            | Standard<br>deviation | Mean<br>difference | Variance<br>ratio | KS     | Mean                 | Standard<br>deviation | Mean               | Standard<br>deviation | Mean<br>difference | Variance<br>ratio | KS     |
| Age                                             | Contin. | 690.938           | 123.594               | 621.497         | 126.606               | -0.5550            | 10.493            | 0.2910 | 641.090              | 138.369               | 640.629            | 126.716               | -0.0037            | 0.8387            | 0.0750 |
| eGFR                                            | Contin. | 624.235           | 210.973               | 733.653         | 219.317               | 0.5085             | 10.807            | 0.0494 | 696.721              | 221.654               | 700.080            | 226.666               | 0.0156             | 10.457            | 0.0560 |
| eGFR:<NA>                                       | Binary  | 0.1146            | 0.3185                | 0.1247          | 0.3304                | 0.0312             | .                 | 0.0101 | 0.1132               | 0.3168                | 0.1205             | 0.3256                | 0.0226             | .                 | 0.0073 |
| Family history of aortic dissection or aneurysm | Binary  | 0.0781            | 0.2684                | 0.0499          | 0.2177                | -0.1156            | .                 | 0.0282 | 0.0654               | 0.2472                | 0.0580             | 0.2338                | -0.0300            | .                 | 0.0073 |
| Prior cardiac surgery                           | Binary  | 0.0521            | 0.2222                | 0.0249          | 0.1560                | -0.1414            | .                 | 0.0271 | 0.0358               | 0.1857                | 0.0348             | 0.1833                | -0.0051            | .                 | 0.0010 |
| Hypertension                                    | Binary  | 0.7865            | 0.4098                | 0.7868          | 0.4095                | 0.0010             | .                 | 0.0004 | 0.7999               | 0.4001                | 0.7899             | 0.4074                | -0.0244            | .                 | 0.0100 |
| Diabetes                                        | Binary  | 0.0781            | 0.2684                | 0.0544          | 0.2268                | -0.0954            | .                 | 0.0237 | 0.0471               | 0.2118                | 0.0598             | 0.2371                | 0.0512             | .                 | 0.0127 |
| Obesity                                         | Binary  | 0.1302            | 0.3365                | 0.1746          | 0.3796                | 0.1238             | .                 | 0.0444 | 0.1575               | 0.3643                | 0.1642             | 0.3704                | 0.0185             | .                 | 0.0067 |
| Prior stroke                                    | Binary  | 0.0208            | 0.1428                | 0.0227          | 0.1489                | 0.0126             | .                 | 0.0018 | 0.0273               | 0.1630                | 0.0239             | 0.1526                | -0.0238            | .                 | 0.0035 |
| Pulmonary disease                               | Binary  | 0.0781            | 0.2684                | 0.0408          | 0.1979                | -0.1582            | .                 | 0.0373 | 0.0499               | 0.2178                | 0.0468             | 0.2111                | -0.0135            | .                 | 0.0032 |
| Extracardiac arteriopathy                       | Binary  | 0.0417            | 0.1998                | 0.0317          | 0.1753                | -0.0528            | .                 | 0.0099 | 0.0315               | 0.1746                | 0.0315             | 0.1748                | 0.0004             | .                 | 0.0001 |
| Poor mobility                                   | Binary  | 0.0677            | 0.2512                | 0.0816          | 0.2738                | 0.0530             | .                 | 0.0139 | 0.0764               | 0.2656                | 0.0791             | 0.2698                | 0.0102             | .                 | 0.0027 |
| Recent myocardial infarction                    | Binary  | 0.0260            | 0.1593                | 0.0317          | 0.1753                | 0.0341             | .                 | 0.0057 | 0.0178               | 0.1321                | 0.0305             | 0.1721                | 0.0763             | .                 | 0.0128 |

|                                                    |        |        |        |        |        |         |   |        |        |        |        |        |        |   |        |
|----------------------------------------------------|--------|--------|--------|--------|--------|---------|---|--------|--------|--------|--------|--------|--------|---|--------|
| Cardiogenic shock requiring inotropes              | Binary | 0.0833 | 0.2764 | 0.1179 | 0.3225 | 0.1151  | . | 0.0346 |        |        |        |        |        |   |        |
|                                                    |        |        |        |        |        |         |   |        | 0.0880 | 0.2833 | 0.1099 | 0.3128 | 0.0728 | . | 0.0219 |
| Intubated at arrival                               | Binary | 0.3177 | 0.4656 | 0.2766 | 0.4473 | -0.0899 | . | 0.0411 |        |        |        |        |        |   |        |
|                                                    |        |        |        |        |        |         |   |        | 0.2869 | 0.4523 | 0.2907 | 0.4541 | 0.0083 | . | 0.0038 |
| Any malperfusion excluding myocardial malperfusion | Binary | 0.2135 | 0.4098 | 0.2472 | 0.4314 | 0.0799  | . | 0.0336 |        |        |        |        |        |   |        |
|                                                    |        |        |        |        |        |         |   |        | 0.2280 | 0.4196 | 0.2388 | 0.4264 | 0.0256 | . | 0.0108 |
| Total or partial aortic arch repair                | Binary | 0.1562 | 0.3631 | 0.2336 | 0.4231 | 0.1961  | . | 0.0773 |        |        |        |        |        |   |        |
|                                                    |        |        |        |        |        |         |   |        | 0.1934 | 0.3949 | 0.2094 | 0.4069 | 0.0406 | . | 0.0160 |
| Bicuspid aortic valve                              | Binary | 0.0000 | 0.0000 | 0.0272 | 0.1627 | 0.2365  | . | 0.0272 |        |        |        |        |        |   |        |
|                                                    |        |        |        |        |        |         |   |        | 0.0000 | 0.0000 | 0.0188 | 0.1357 | 0.1632 | . | 0.0188 |

eGFR, estimated glomerular filtration rate

**Supplementary Figure S1.** Covariate balance plot in weighted samples for the female and male patients.

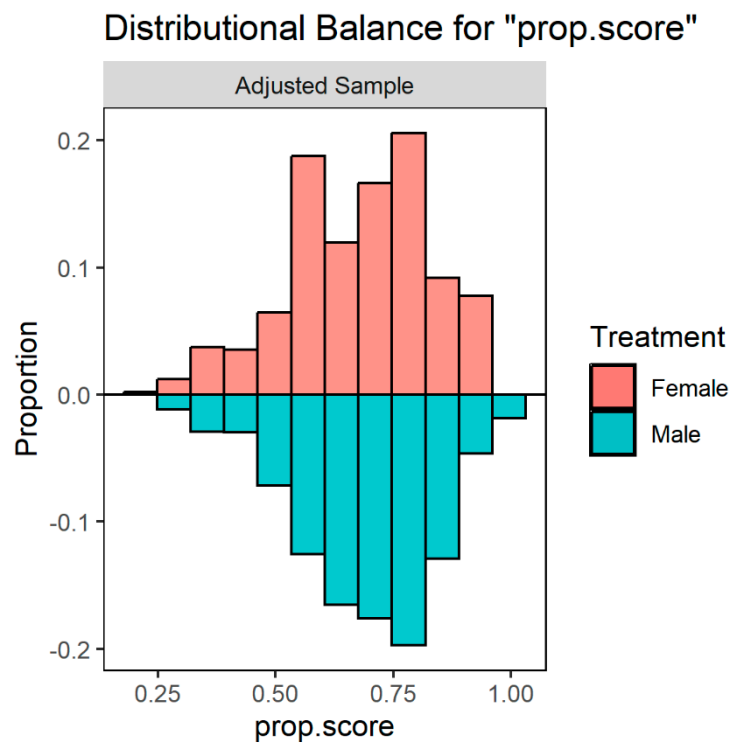

Supplementary Figure S2. Love plot graphically displaying covariate balance before and after adjusting.

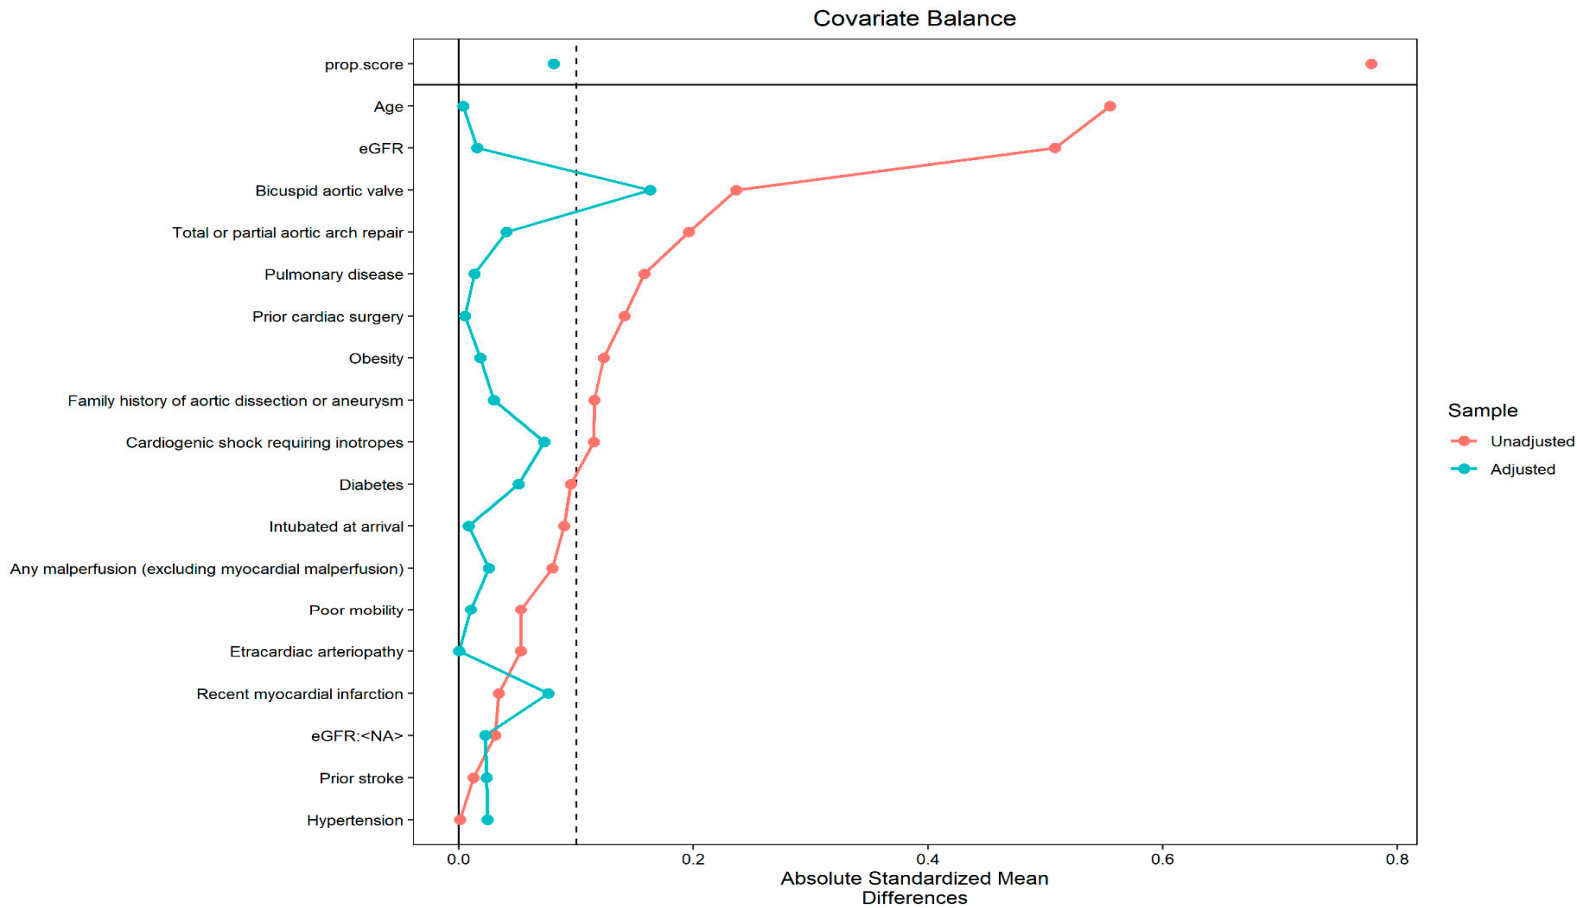

Supplementary Figure S3. ROC curve of the propensity scores.

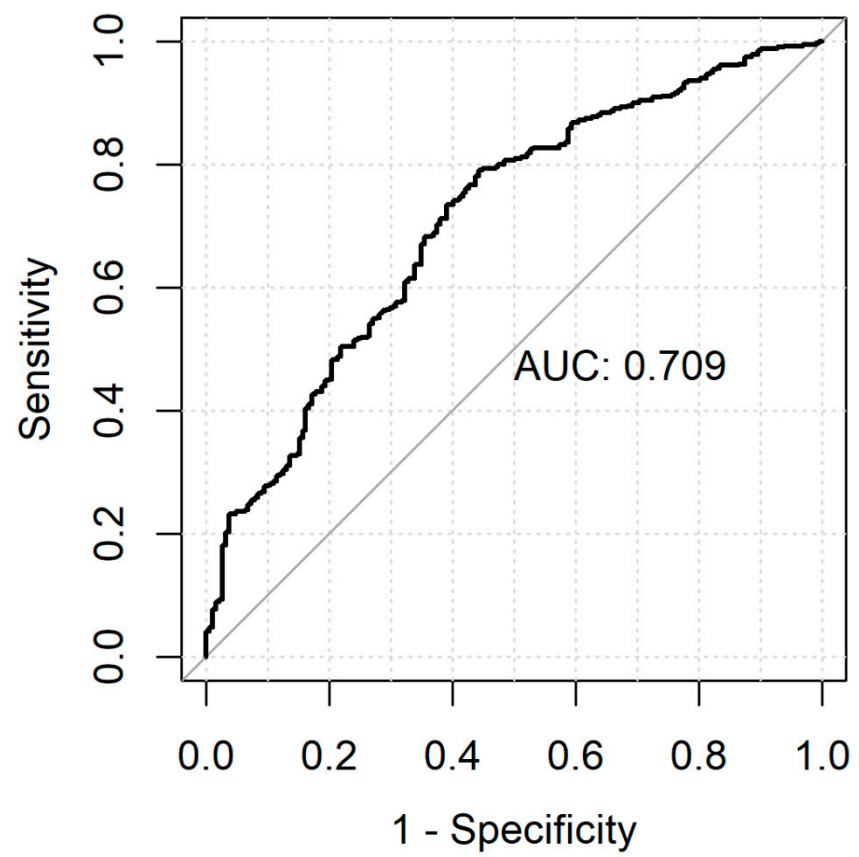

Supplementary Figure S4. Variation of in-hospital mortality over time.

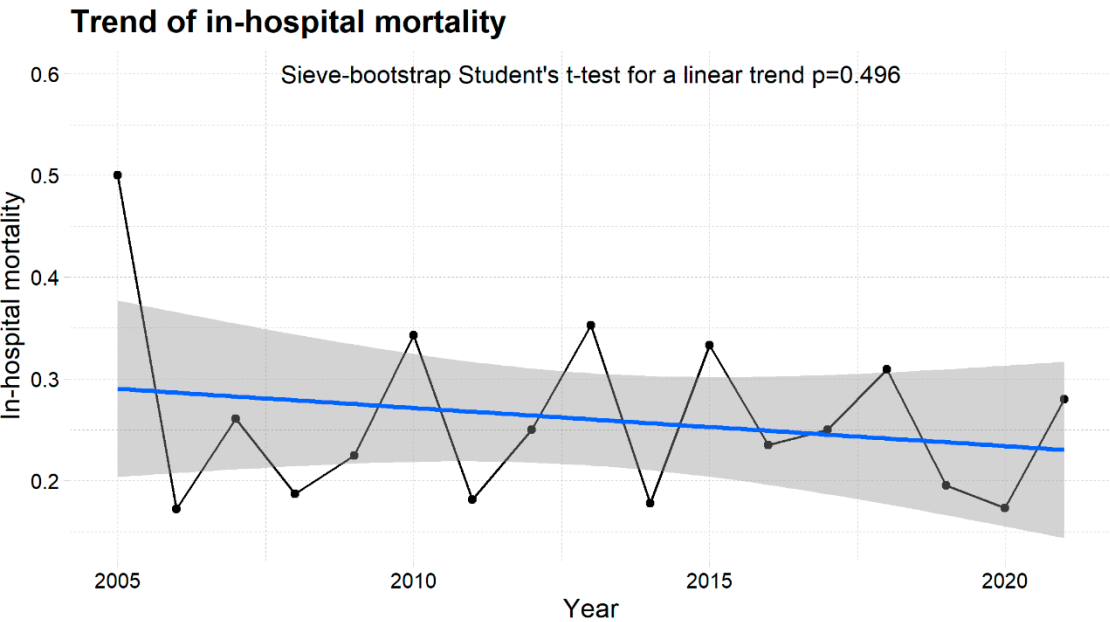

Supplement: s1 [file s1]
